# Supplementary material for: Mining for coexpression across hundreds of datasets using novel rank aggregation and visualization methods
Source: PubMed Central journal article supplement (PMC2812946; doi:10.1186/gb-2009-10-12-r139), 2009-12-04

## Finding the standard deviation threshold

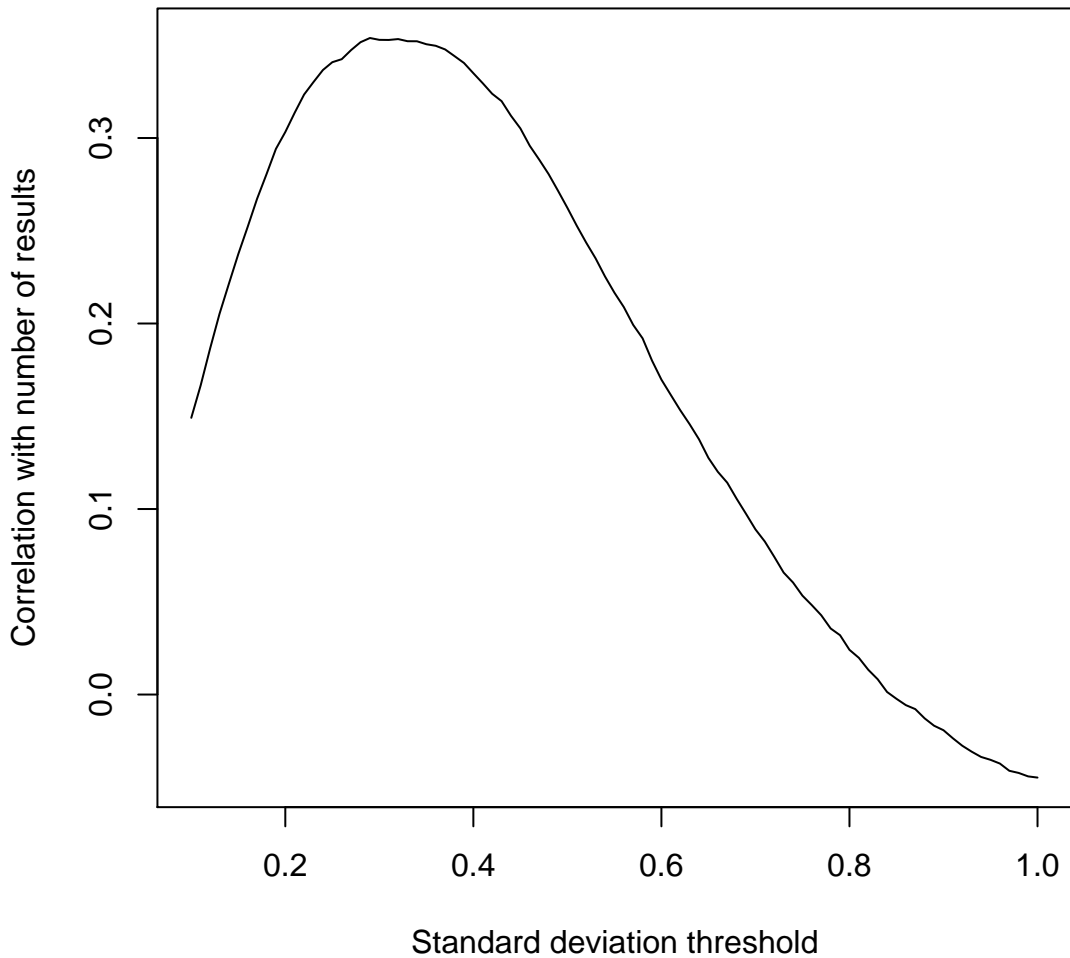

Supplement: gb-2009-10-12-r139-S4.pdf [file gb-2009-10-12-r139-S4.pdf]
